# Supplementary figures and images for: Direct RT-PCR amplification of SARS-CoV-2 from clinical samples using a concentrated viral Lysis-Amplification Buffer prepared with IGEPAL-630.
Source: Research Square preprint supplement (doi:10.21203/rs.3.rs-122135/v1), 2020-12-15

Table 1


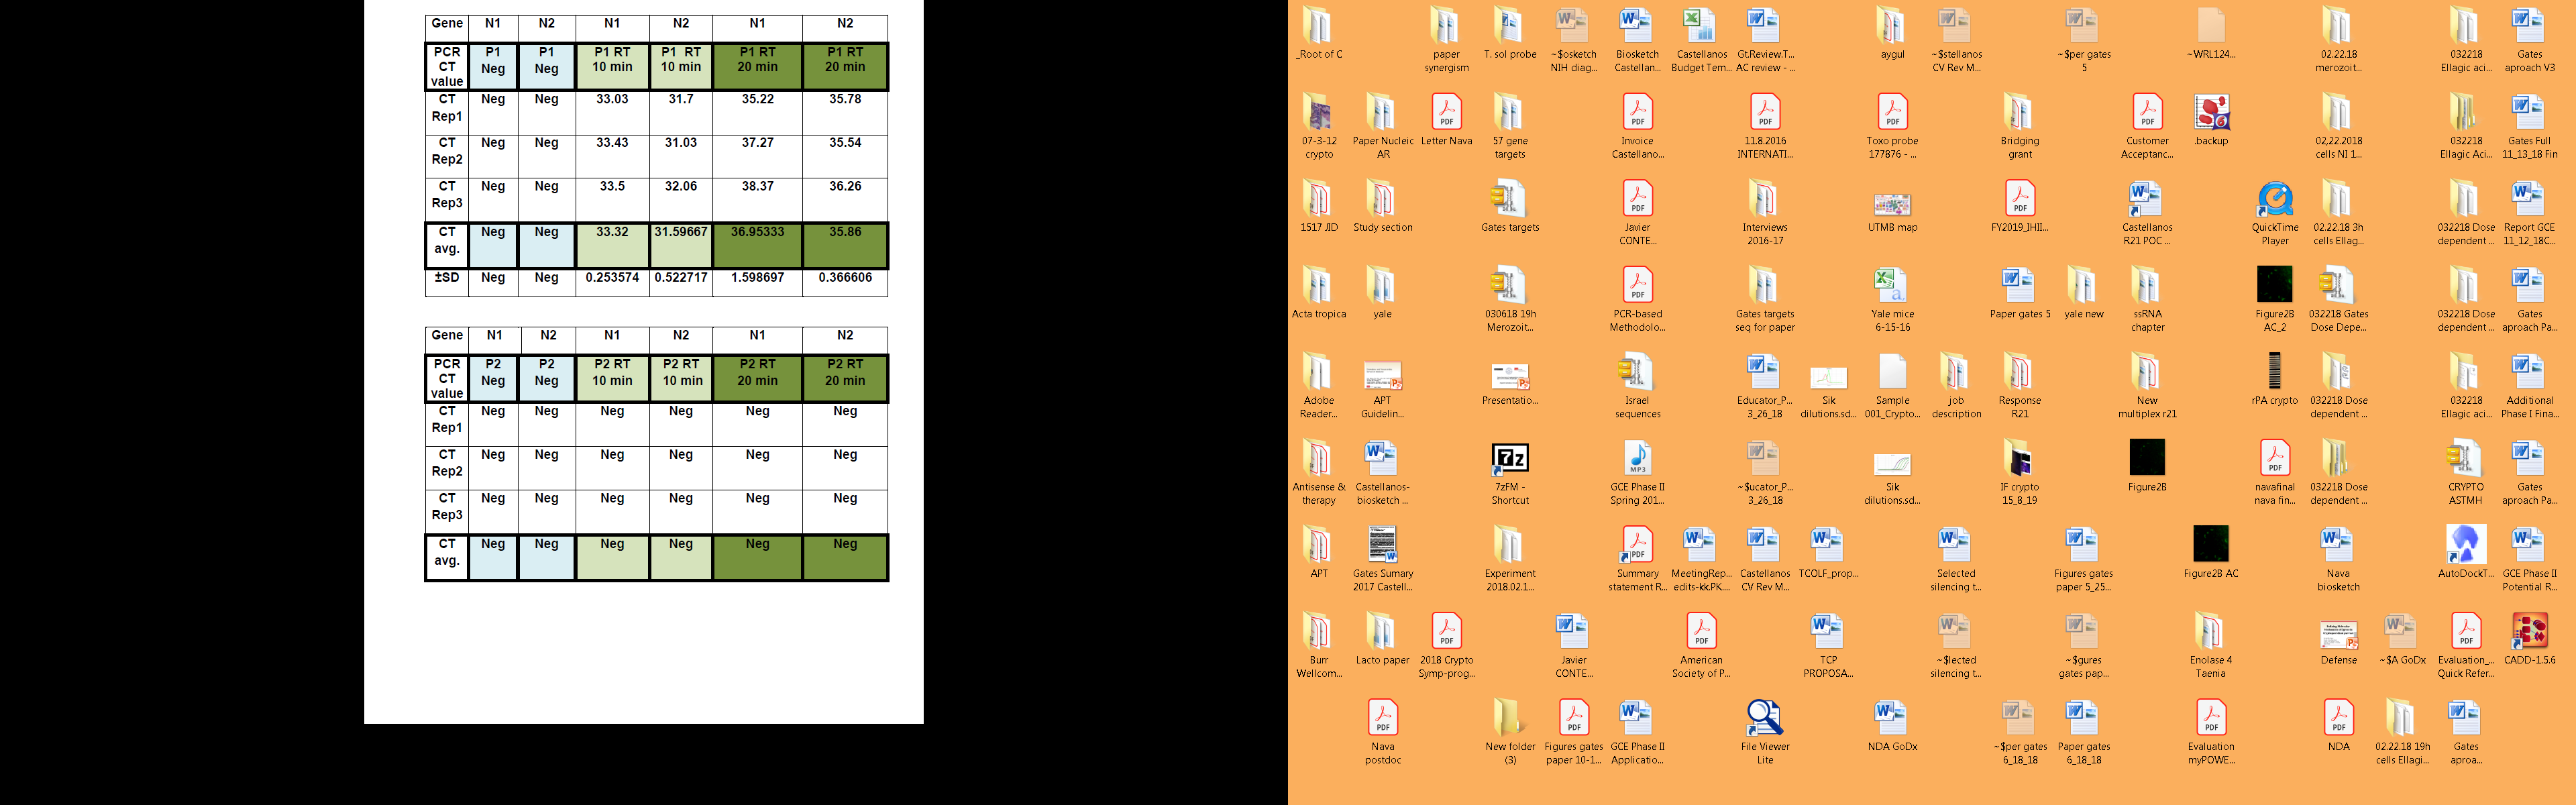


Table 2


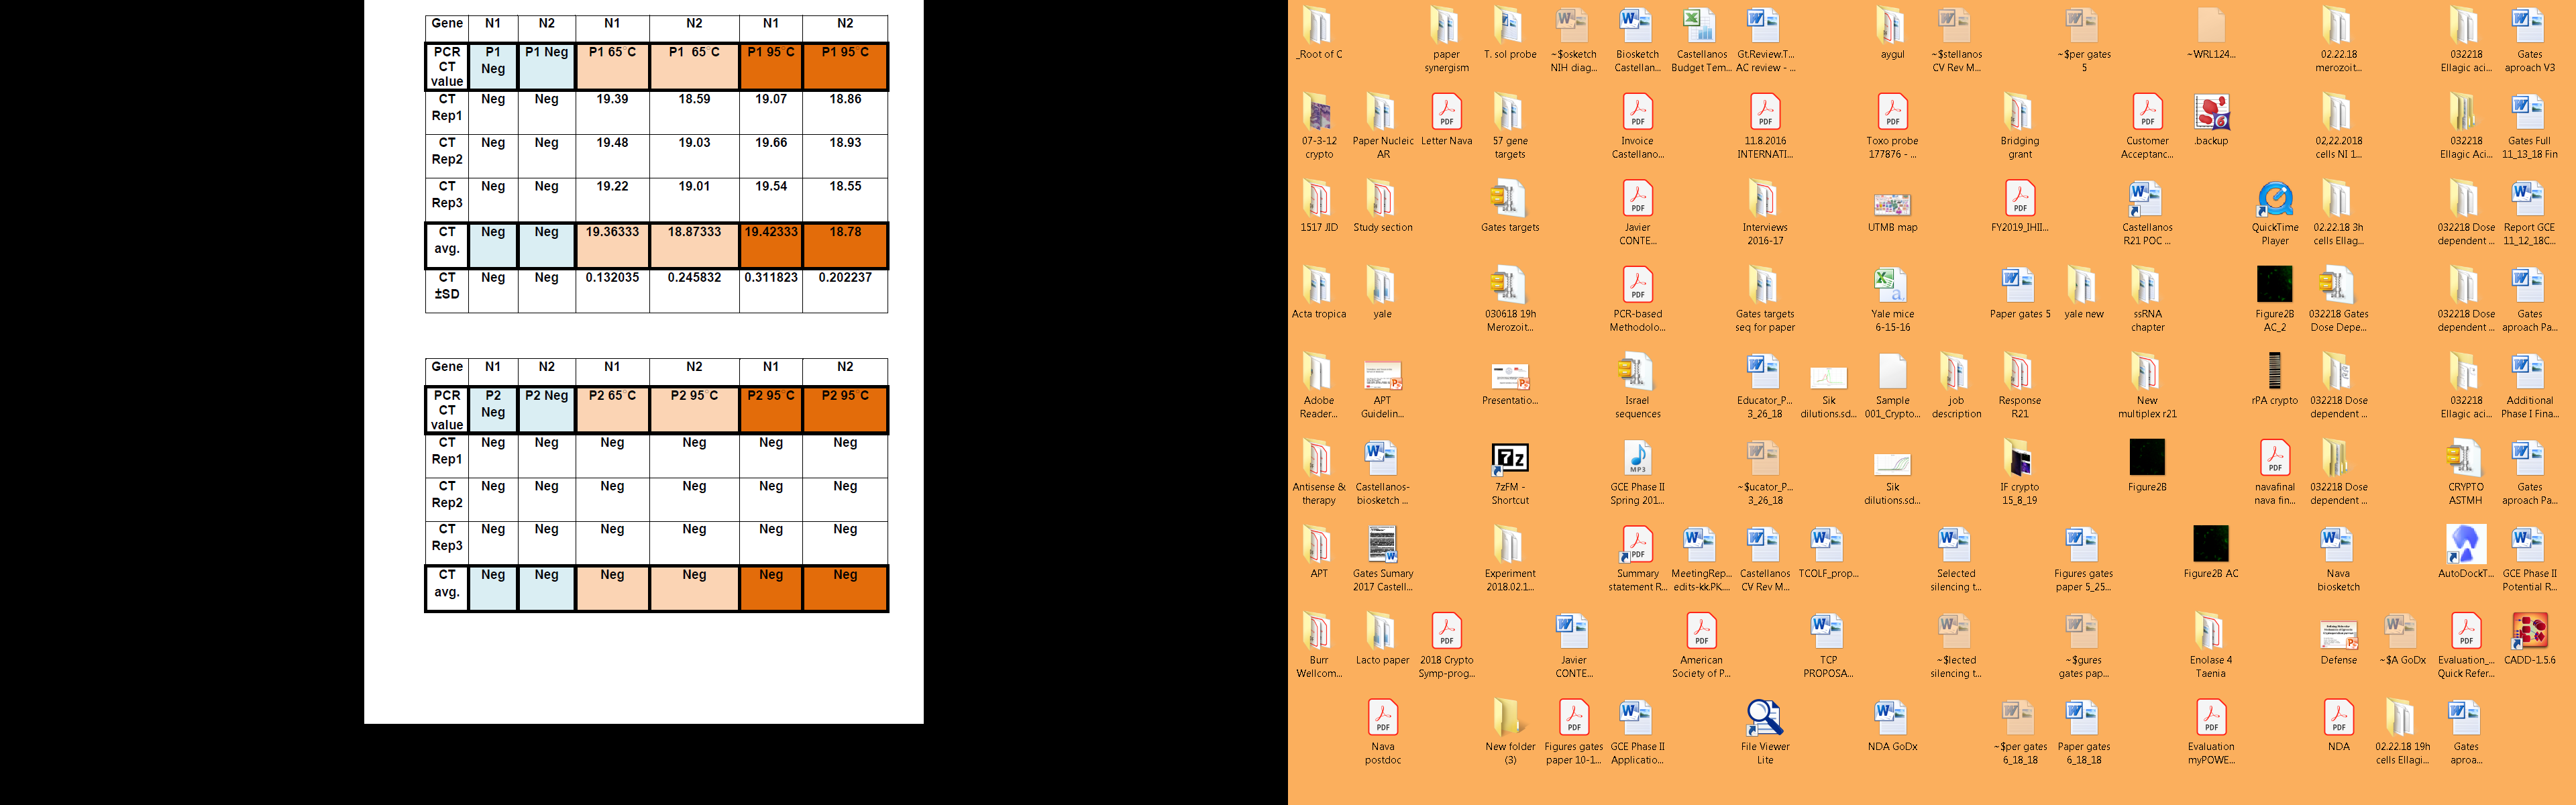


Table 3


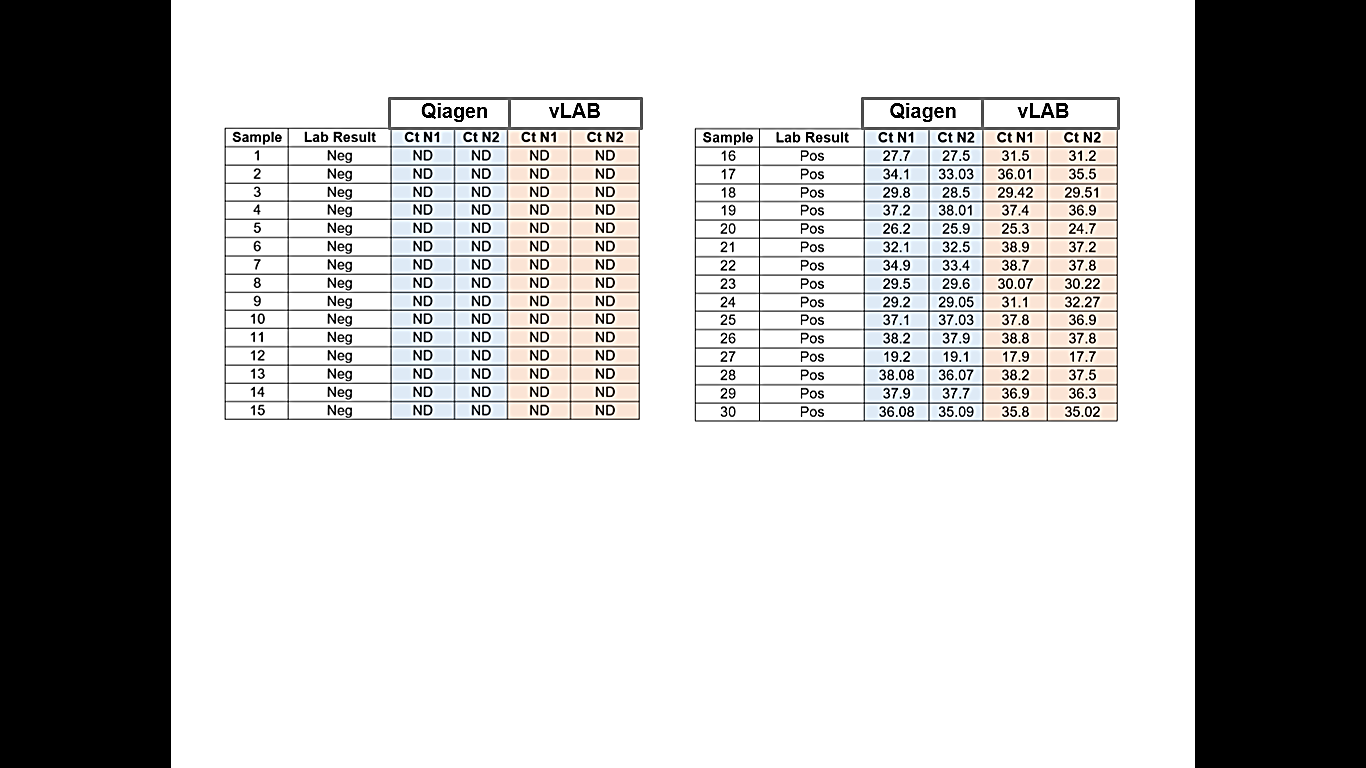


Table 4


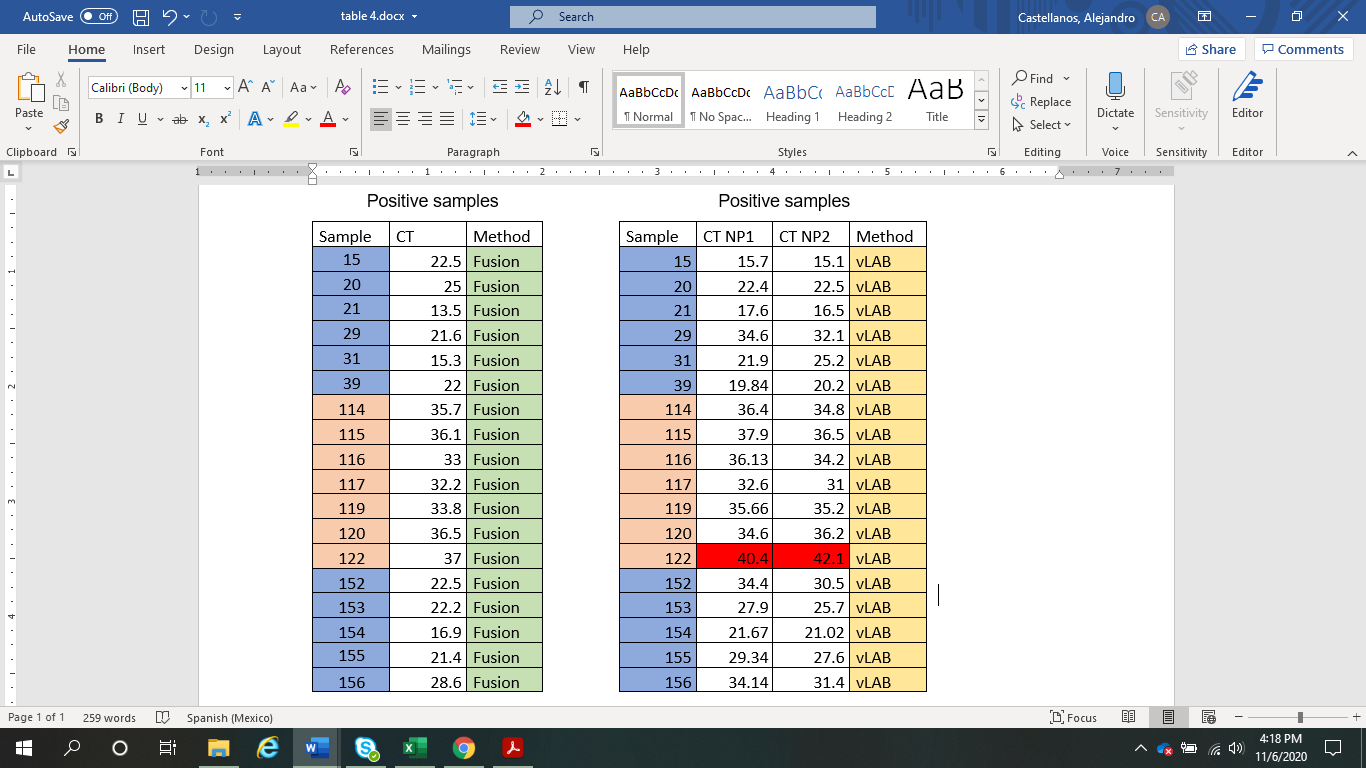

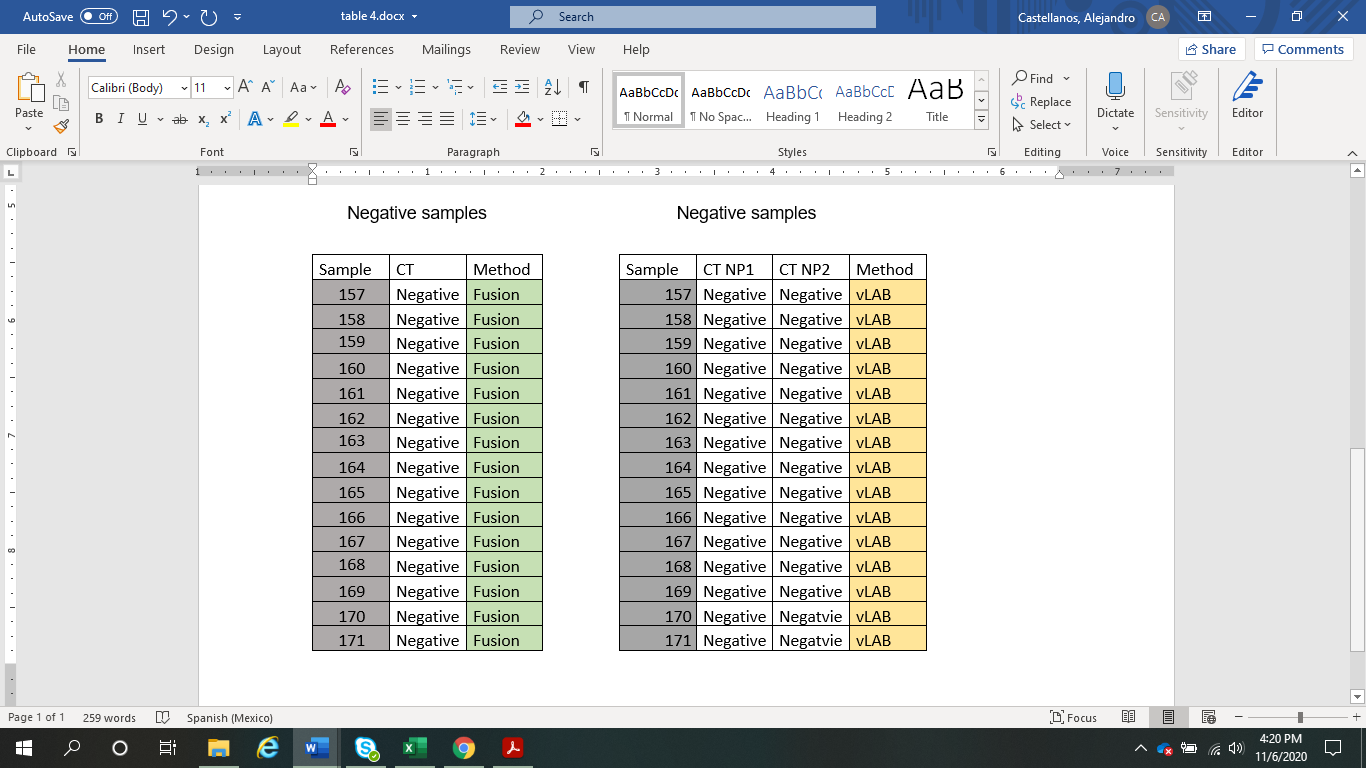

Supplement: Supplementary file 1 [file afb4f890f762428075509525.doc]
